# Supplementary material for: Deployment of Solar Energy at the Expense of Conservation Sensitive Areas Precludes Its Classification as an Environmentally Sustainable Activity
Source: MDPI journal article supplement (doi:10.3390/land11122330), 2022-12-19
Supplement: s1 [file s1]

## Supplementary Material

Table S1. Information on the photovoltaic plant projects (PPs) reviewed in this study

(n= 35). The name of the plant, the administrative reference and the source where all the information has been published are shown. \* Information obtained from the Environmental Impact Study of Salvatierra (AAUA/AL/0002/22). The links to the search engines of the various official gazettes are: BOE:

<https://www.boe.es/buscar/>; BOP: <https://app.dipalme.org/bop/publico.zul>;

BOJA: <https://www.juntadeandalucia.es/eboja.html>

| PPs name                 | Reference       | Source                                           |
|--------------------------|-----------------|--------------------------------------------------|
| ALHAMILLA<br><br>SOLAR   | AAU/AL/0004/20  | BOJA nº 52. Thursday, 18 March 2021, p. 424      |
| CSF TABERNAS             | AAU/AL/0027/19  | BOJA nº 241. Tuesday, 17 December 2019, p. 276   |
| CSV TABERNAS             | AAU/AL/0002/20  | BOJA nº 55. Friday, 20 March 2020, p. 66         |
| EGA                      | AAU/AL/0005/18  | BOJA nº 88. Wednesday, 9 May 2018, p. 163        |
| FV CADIMA                | AAU/AL/0006/18  | BOJA nº 93. Wednesday, 16 May 2018, p. 89        |
| GRUPOTEC<br><br>TABERNAS | AAUA/AL/0005/18 | BOJA nº 103. Wednesday, 30 May 2018, p. 286      |
| HORNOSOL                 | AAU/AL/0034/20  | BOJA nº 52. Thursday, 18 Marc 2021, p. 422       |
| IMPROVING*               | AAUA/AL/0002/22 | BOJA nº 166. Tuesday, 30 August 2022, p. 13543/1 |
| LA CABRITA               | AAU/AL/0015/17  | BOJA nº 2. Wednesday, 3 January 2018, p. 214     |
| LA PARED 2               | AAU/AL/0001/20  | BOJA nº 68. Tuesday, 13 April 2021, p. 187       |

|                 |                 |                                                         |
|-----------------|-----------------|---------------------------------------------------------|
| LA PARED 3      | AAU/AL/0030/20  | BOJA nº 88. Tuesday, 11 May 2021, p. 122                |
| LA PARED 4      | AAU/AL/0030/20  | BOJA nº 88. Tuesday, 11 May 2021, p. 122                |
| LA PARED 5      | AAU/AL/0006/21  | BOJA nº 101. Friday, 28 May 2021, p. 201                |
| LA PARED 6      | AAU/AL/0006/21  | BOJA nº 101. Friday, 28 May 2021, p. 201                |
| LA PARED 7      | AAU/AL/0006/21  | BOJA nº 101. Friday, 28 May 2021, p. 201                |
| LA RAMBLA       | PFot-040        | BOE nº 60. Thursday, 11 March 2021, p. 15393            |
| LUCAINENA       | AAU/AL/0009/20  | BOJA nº 141. Thursday, 23 July 2020, p. 105             |
| MARCHA SOLAR    | AAU/AL/0013/21  | BOP Almería nº 210. Wednesday, 3 November 2021,<br>p. 8 |
| NIJARMAR I      | AAU/AL/0008/19  | BOP Almería nº 197. Thursday, 14 October 2021, p.<br>20 |
| PSF TURRILLAS   | AAU/AL/0022/17  | BOJA nº 53. Friday, 16 March 2018, p. 172               |
| PSFV JERJES     | AAU/AL/0006/21  | BOJA nº 164. Thursday, 26 August 2021, p. 42            |
| PSPV TABERNAS*  | AAUA/AL/0002/22 | BOJA nº 166, Tuesday, 30 August 2022, p. 13543/1        |
| SALVATIERRA     | AAUA/AL/0002/22 | BOJA nº 166. Tuesday, 30 August 2022, p. 13543/1        |
| STROM*          | AAUA/AL/0002/22 | BOJA nº 166. Tuesday, 30 August 2022, p. 13543/1        |
| TABERNAS 1 ABEI | AAU/AL/0010/21  | BOJA nº 55. Friday, 20 March 2020, p. 66                |
| TABERNAS 2 ABEI | AAU/AL/0009/21  | BOJA nº 107. Monday, 7 June 2021, p. 35                 |
| TABERNAS I      | AAU/AL/0013/20  | BOJA nº 166. Thursday, 27 August 2020, p. 30            |
| TABERNAS I & II | AAU/AL/0001/19  | BOJA nº 128. Friday, 5 July 2019, p. 150                |
| TABERNAS SOLAR  | AAU/AL/0020/20  | BOJA nº 2. Tuesday, 5 January 2021, p. 267              |

|                |                 |                                                    |
|----------------|-----------------|----------------------------------------------------|
| TABERNAS SOLAR | AAU/AL/0021/20  | BOP Almería nº 241. Wednesday, 16 December 2020,   |
| 2              |                 | p. 9                                               |
| TABERNAS SOLAR | AAU/AL/0022/20  | BOJA nº 247. Thursday, 24 December 2020, p. 275    |
| 3              |                 |                                                    |
| TERRERA SOLAR  | AAU/AL/0005/20  | BOJA nº 59. Monday, 29 March 2021, p. 463          |
| TRAVENZA*      | AAUA/AL/0002/22 | BOJA nº 166. Tuesday, 30 August 2022, p. 13543/1   |
| TURIA          | AAUA/AL/0003/22 | BOJA nº 184. Friday, 23 September 2022, p. 14105/1 |
| VENTURA SOLAR  | AAU/AL/0010/20  | BOJA nº 52. Thursday, 18 March 2021, p. 420        |

Text S1. Main legislation cited (chronological order)

Council Directive 92/43/EEC of 21 May 1992 on the conservation of natural habitats and of wild fauna and flora. <https://eur-lex.europa.eu/eli/dir/1992/43/oj>

Instrument of Ratification of the Convention on Access to Information, Public Participation in Decision-making and Access to Justice in Environmental Matters, done at Aarhus, Denmark, on 25 June 1998.  
[https://www.boe.es/eli/es/ai/1998/06/25/\(1\)](https://www.boe.es/eli/es/ai/1998/06/25/(1))

Directive 2001/42/EC of the European Parliament and of the Council of 27 June 2001 on the assessment of the effects of certain plans and programmes on the environment. <https://eur-lex.europa.eu/eli/dir/2001/42/oj>

Act 9/2006 of 28 April 2006 on the assessment of the effects of certain plans and programmes on the environment [derogated].  
<https://www.boe.es/eli/es/l/2006/04/28/9>

Act 2/2007, of 27 March, on the promotion of renewable energies and energy saving and efficiency in Andalusia. <https://www.boe.es/eli/es-an/l/2007/03/27/2>

Act 42/2007, of 13 December 2007, on Natural Heritage and Biodiversity.  
<https://www.boe.es/eli/es/l/2007/12/13/42/con>

Directive 2009/147/EC of the European Parliament and of the Council of 30 November 2009 on the conservation of wild birds. <https://eur-lex.europa.eu/eli/dir/2009/147/oj>

Decree 356/2010, of 3 August, which regulates the unified environmental authorisation, establishes the system of organisation and operation of the register of authorisations for actions subject to the instruments of environmental prevention and control, of activities potentially polluting the atmosphere and of facilities that emit volatile organic compounds, and modifies the content of Annex I of Act 7/2007, of 9 July, on Integrated Environmental Quality Management.

<https://www.juntadeandalucia.es/boja/2010/157/2>

Directive 2011/92/EU of the European Parliament and of the Council of 13 December 2011 on the assessment of the effects of certain public and private projects on the environment. <https://eur-lex.europa.eu/eli/dir/2011/92/oj>

Act 21/2013, of 9 December, on environmental assessment.

<https://www.boe.es/eli/es/l/2013/12/09/21>

Act 24/2013, of 26 December, on the Electricity Sector.

<https://www.boe.es/eli/es/l/2013/12/26/24/con>

Proposal for a DIRECTIVE OF THE EUROPEAN PARLIAMENT AND OF THE COUNCIL amending Directive (EU) 2018/2001 on the promotion of the use of energy from renewable sources, Directive 2010/31/EU on the energy performance of buildings and Directive 2012/27/EU on energy efficiency, COM/2022/222 final.

<https://eur-lex.europa.eu/legal-content/EN/TXT/?uri=COM:2022:222:FIN>

Regulation (EU) 2020/852 of the European Parliament and of the Council of 18 June 2020 on the establishment of a framework to facilitate sustainable investment,

and amending Regulation (EU) 2019/2088. <https://eur-lex.europa.eu/eli/reg/2020/852/oj>

Act 7/2021 of 20 May on climate change and energy transition.

<https://www.boe.es/eli/es/l/2021/05/20/7>

Royal Decree-act 11/2022, of 25 June, adopting and extending certain measures to respond to the economic and social consequences of the war in Ukraine, to address situations of social and economic vulnerability, and for the economic and social recovery of the island of La Palma.

<https://www.boe.es/eli/es/rdl/2022/06/25/11/con>

Proposal for a COUNCIL REGULATION laying down a framework to accelerate the deployment of renewable energy, COM/2022/591 final. <https://eur-lex.europa.eu/legal-content/EN/TXT/?uri=COM:2022:591:FIN>
